# Supplementary material
Source: MDPI journal article supplement (https://www.mdpi.com/1996-1073/15/1/268)
Supplement: s1 [file s1 › Supplementary data.pdf]

Table S1. Statistical models for butyric acid conversion and yields of propane and CO<sub>2</sub> under compressed air atmosphere

| Models         | Statistics            | Response   |         |                 |
|----------------|-----------------------|------------|---------|-----------------|
|                |                       | Conversion | Propane | CO <sub>2</sub> |
| Linear         | R <sup>2</sup>        | 0.68       | 0.28    | 0.81            |
|                | R <sup>2</sup> -adj.  | 0.65       | 0.22    | 0.79            |
|                | R <sup>2</sup> -pred. | 0.56       | 0.1     | 0.74            |
|                | SD                    | 15.8       | 14      | 4.01            |
| Linear Square  | R <sup>2</sup>        | 0.93       | 0.90    | 0.95            |
|                | R <sup>2</sup> -adj.  | 0.94       | 0.88    | 0.94            |
|                | R <sup>2</sup> -pred. | 0.92       | 0.85    | 0.93            |
|                | SD                    | 6.4        | 5.4     | 2.06            |
| Full quadratic | R <sup>2</sup>        | 0.96       | 0.90    | 0.98            |
|                | R <sup>2</sup> -adj.  | 0.96       | 0.88    | 0.97            |
|                | R <sup>2</sup> -pred. | 0.95       | 0.85    | 0.94            |
|                | SD                    | 4.9        | 5.4     | 1.5             |
| Cubic          | R <sup>2</sup>        | 0.99       | 0.97    | 0.95            |
|                | R <sup>2</sup> -adj.  | 0.98       | 0.97    | 0.94            |
|                | R <sup>2</sup> -pred. | 0.98       | 0.95    | 0.91            |
|                | SD                    | 2.8        | 2.63    | 2.2             |

Table S2. Statistical models for butyric acid conversion and yields of propane and CO<sub>2</sub> under hydrogen gas atmosphere

| Models         | Statistics            | Response   |         |                 |
|----------------|-----------------------|------------|---------|-----------------|
|                |                       | Conversion | Propane | CO <sub>2</sub> |
| Linear         | R <sup>2</sup>        | 0.86       | 0.48    | 0.61            |
|                | R <sup>2</sup> -adj.  | 0.84       | 0.44    | 0.58            |
|                | R <sup>2</sup> -pred. | 0.80       | 0.26    | 0.47            |
|                | Sdv.                  | 9.9        | 9.1     | 5.4             |
| Linear Square  | R <sup>2</sup>        | 0.97       | 0.97    | 0.95            |
|                | R <sup>2</sup> -adj.  | 0.96       | 0.96    | 0.93            |
|                | R <sup>2</sup> -pred. | 0.95       | 0.96    | 0.91            |
|                | Sdv.                  | 4.8        | 2.3     | 2.1             |
| Full quadratic | R <sup>2</sup>        | 0.99       | 0.98    | 0.98            |
|                | R <sup>2</sup> -adj.  | 0.99       | 0.97    | 0.97            |
|                | R <sup>2</sup> -pred. | 0.98       | 0.96    | 0.95            |
|                | Sdv.                  | 2.3        | 1.7     | 1.3             |
| Cubic          | R <sup>2</sup>        | 0.98       | 0.98    | 0.97            |
|                | R <sup>2</sup> -adj.  | 0.98       | 0.97    | 0.97            |
|                | R <sup>2</sup> -pred. | 0.97       | 0.97    | 0.96            |
|                | Sdv.                  | 3.3        | 1.7     | 1.4             |

Table S3. ANOVA results for the models for butyric acid conversion and yields of propane and CO<sub>2</sub> under compressed air atmosphere

| Response        | Factors        | DF | Mean of Square | F-value | P-Value |
|-----------------|----------------|----|----------------|---------|---------|
| Conversion      | Block          | 2  | 495.38         | -       |         |
|                 | Model          | 2  | 5230.2         | 55.1    | 0.0001  |
|                 | A              | 1  | 8307.5         | 87.52   | 0.0007  |
|                 | A <sup>2</sup> | 1  | 2209.3         | 23.27   | 0.0001  |
|                 | Residual       | 10 | 94.9           | -       | -       |
|                 | Lack of fit    | 5  | 189.7          | 1422.9  | 0.0001  |
|                 | Pure error     | 5  | 0.13           | -       | -       |
|                 | Total          | 14 | -              | -       | -       |
| Propane         | Block          | 2  | 73.64          |         | -       |
|                 | Model          | 2  | 1229.97        | 19.12   | 0.0004  |
|                 | A              | 1  | 1236.9         | 19.23   | 0.0014  |
|                 | A <sup>2</sup> | 1  | 1239.3         | 19.26   | 0.0014  |
|                 | Residual       | 10 | 64.3           | -       | 0.03    |
|                 | Lack of fit    | 5  | 128.7          | -       | 0.0001  |
|                 | Pure error     | 5  | 0.0013         | -       |         |
|                 | Total          | 14 | -              | -       | -       |
| CO <sub>2</sub> | Block          | 2  | 227.34         | -       |         |
|                 | Model          | 3  | 616.7          | 122.1   | 0.0001  |
|                 | A              | 1  | 0.038          | 0.007   | 0.9     |
|                 | A <sup>2</sup> | 1  | 249.3          | 49.3    | 0.0001  |
|                 | A <sup>3</sup> | 1  | 125.49         | 24.8    | 0.0008  |
|                 | Residual       | 9  | 5.06           | -       | -       |
|                 | Lack of fit    | 4  | 11.18          | 72.29   | 0.0001  |
|                 | Pure error     | 5  | 0.155          | -       | -       |
|                 | Total          | 14 | -              | -       | -       |

Table S4. ANOVA results for the models for butyric acid conversion and yields of propane and CO<sub>2</sub> under hydrogen gas atmosphere

| Response        | Factors        | DF | Mean of Square | F-value | P-Value |
|-----------------|----------------|----|----------------|---------|---------|
| Conversion      | Model          | 4  | 1904.77        | 348.64  | 0.0001  |
|                 | A              | 1  | 1144.74        | 209.53  | 0.0001  |
|                 | A <sup>2</sup> | 1  | 167.89         | 30.73   | 0.0005  |
|                 | A <sup>3</sup> | 1  | 118.21         | 21.64   | 0.0016  |
|                 | A <sup>4</sup> | 1  | 54.66          | 10      | 0.0133  |
|                 | Residual       | 8  | 5.46           | -       | -       |
|                 | Lack of fit    | 3  | 14.32          | 96.77   | 0.0001  |
|                 | Pure error     | 5  | 0.1480         | -       | -       |
|                 | Total          | 12 | -              | -       | -       |
| Propane         | Model          | 3  | 584.84         | 189.91  | 0.0001  |
|                 | A              | 1  | 192.48         | 62.50   | 0.0001  |
|                 | A <sup>2</sup> | 1  | 851.72         | 276.57  | 0.0001  |
|                 | A <sup>3</sup> | 1  | 22.25          | 7.23    | 0.0249  |
|                 | Residual       | 9  | 3.08           | -       | -       |
|                 | Lack of fit    | 4  | 6.93           | 4156.16 | 0.0001  |
|                 | Pure error     | 5  | 0.0017         | -       | -       |
|                 | Total          | 12 | -              | -       | -       |
| CO <sub>2</sub> | Model          | 3  | 271.74         | 129.24  | 0.0001  |
|                 | A              | 1  | 143.98         | 68.48   | 0.0001  |
|                 | A <sup>2</sup> | 1  | 264.35         | 125.73  | 0.0001  |
|                 | A <sup>3</sup> | 1  | 27.38          | 13.02   | 0.0057  |
|                 | Residual       | 9  | 2.1            | -       | -       |
|                 | Lack of fit    | 4  | 4.72           | 708.36  | 0.0001  |
|                 | Pure error     | 5  | 0.0067         | -       | -       |
|                 | Total          | 12 | -              | -       | -       |
